# Supplementary material for: Measuring the context of care in an Australian acute care hospital: a nurse survey
Source: Springer Nature journal article supplement (doi:10.1186/1748-5908-5-60), 2010-08-02

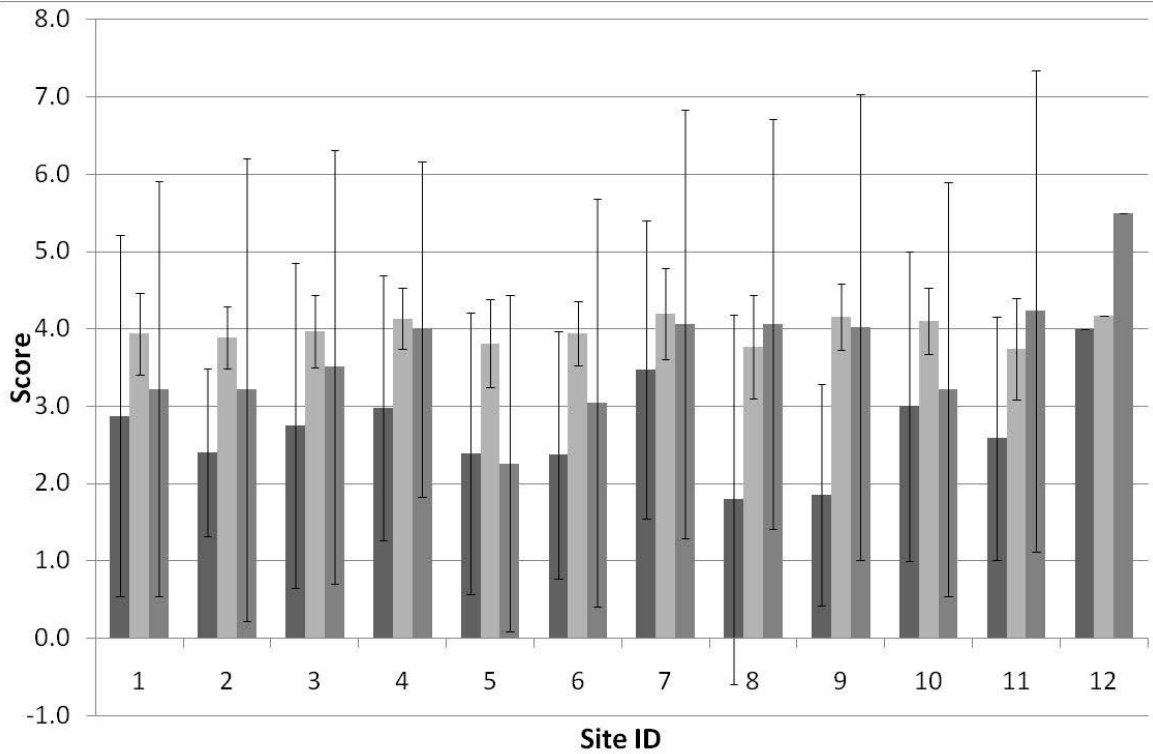

Supplement: 13012_2009_274_MOESM2_ESM.pdf [file 13012_2009_274_MOESM2_ESM.pdf]
